## **The use of a chimeric rhodopsin vector for the detection of new proteorhodopsins based on color**

Alina Pushkarev<sup>1</sup>, Gur Hevroni<sup>1</sup>, Sheila Roitman<sup>1</sup>, Jin-gon Shim<sup>2</sup>, Ahreum  
5 Choi<sup>2</sup>, Kwang-Hwan Jung<sup>2</sup> and Oded Béjà<sup>1\*</sup>

<sup>1</sup> Faculty of Biology, Technion – Israel Institute of Technology, Haifa 32000, Israel; <sup>2</sup> Department of Life Science and Institute of Biological Interfaces, Sogang University, 35 Baekbeom-ro, Mapo-Gu, Seoul 121-742, Republic of Korea

10

\* Correspondence: Oded Béjà, Faculty of Biology, Technion – Israel Institute of Technology, Haifa 32000, Israel. Office: (+972)-4-8293961, Lab: (+972)-4-8293410, Fax: (+972)-4-8225153. Email: [beja@tx.technion.ac.il](mailto:beja@tx.technion.ac.il)

15

## **Abstract**

**Student microbial ecology laboratory courses are often conducted as condensed courses in which theory and wet lab work are combined in a very intensive short time period. In last decades, the study of marine microbial ecology is increasingly reliant on molecular-based methods, and as a result many of the research projects conducted in such courses require sequencing that is often not available on site and may take more time than a typical course allows. In this work, we describe a protocol combining molecular and functional methods for analyzing proteorhodopsins (PRs), with visible results in only 4-5 days, that do not rely on sequencing. PRs were discovered in oceanic surface waters two decades ago, and have since been observed in different marine environments and diverse taxa, including the abundant alphaproteobacterial SAR11 group. PR subgroups are currently known to absorb green and blue light, and their distribution was previously explained by prevailing light conditions – green pigments at the surface and blue pigments in deeper waters, as blue light travels deeper in the water column. To detect PR in environmental samples, we created a chimeric plasmid suitable for direct expression of PRs using PCR amplification and functional analysis in *Escherichia coli* cells. Using this assay, we discovered several exceptional cases of PRs whose phenotypes differed from those predicted based on sequence only, including a previously undescribed yellow-light absorbing PRs. We applied this assay in two 10-days marine microbiology courses and found it to greatly enhance students' laboratory experience, enabling**

**them to gain rapid visual feedback and colorful reward for their work. Furthermore we expect this assay to promote the use of functional assays for the discovery of new rhodopsin variants.**

45 **Keywords**

Proteorhodopsin; Spectral tuning; Niche adaptation; Student laboratory courses; Marine

**Introduction**

50 Microbial retinal-based ion pumps were first discovered in the hypersaline dwelling archaea *Halobacterium salinarum* (Oesterhelt and Stoeckenius, 1971). Since then, rhodopsins have been found in various microorganisms, spanning the three domains of the tree of life (Béjà et al., 2013; Pinhassi et al., 2016), and were even detected in viruses (Yutin and  
55 Koonin, 2012; Philosof and Béjà, 2013).

The first bacterial rhodopsin was discovered in the abundant uncultured proteobacterial SAR86 group, and was therefore named proteo-rhodopsin (PR) (Béjà et al., 2000). PRs are light-driven proton pumps that absorb light in the blue or green regions of the visible light spectrum according to the light  
60 available at the depth from which they are isolated (Béjà et al., 2001). The dominant residue responsible for spectral tuning in PRs resides in the retinal-binding pocket at position 105, with leucine or methionine in green-absorbing

PRs (GPRs) and glutamine in blue-absorbing PRs (BPRs) (Man et al., 2003; Gómez-Consarnau et al., 2007). PRs are abundant in the marine  
65 environment, and a recent metagenomics survey estimated that on average, over 60% of small microbial cells in the photic zone carry rhodopsin genes (Finkel et al., 2012).

The search for novel rhodopsins is based mostly on sequence homology screens utilizing metagenomics data collected from various environments  
70 (Venter et al., 2004; Sabeji et al., 2005; Rusch et al., 2007), or PCR performed on environmental DNA samples using degenerate primers designed for conserved regions in microbial rhodopsin proteins (Atamna-Ismaeel et al., 2008; Sharma et al., 2009; Koh et al., 2010). Currently, there are only two functional screens to search for new rhodopsins, (*i*) colony color  
75 by plating fosmid libraries on retinal containing plates (Martínez et al., 2007); and (*ii*) pH changes of fosmid clones in response to illumination (Pushkarev and Bèjà, 2016).

In order to combine sequence homology and function-based methods, we devised a protocol based on a previously designed chimeric PR construct  
80 (Supplementary Fig. S1). This chimeric construct was used to express individual partial PR sequences recovered from the environment via PCR amplification, cloning and sequencing (Choi et al., 2013). Here, we improved the chimeric PR construct to enable the screening of diverse partial PR sequences directly from the environment, enabling rapid visualization of PR  
85 activity. In this manner, we developed a simple way to demonstrate the concept of niche adaptation and spectral tuning to undergraduate and

graduate students. Student labs in marine microbial ecology or marine microbiology are usually offered as condensed courses ranging in length from between 10 to 30 days. Hence, there is a need for short experiments that can  
90 demonstrate some proofs of concept within the course's timeframe.

In this work, we present a protocol (Fig. 1) for analyzing microbial samples using functional and molecular methods in short time spans, enabling students to perform high-level molecular work while receiving immediate visual results.

95

## Materials and Equipment

### *Environmental sampling, DNA extraction and PCR*

Sampling was performed in March 2014 in the Gulf of Aqaba, Station A (29°28'N, 34°55'E) (Supplementary File S1). Twenty liters of water from 0, 20,  
100 40, 60, 80 and 100 meters were filtered through a GFD filter (Whatman) and collected on two 0.22  $\mu\text{m}$  Durapore filters (Millipore). DNA was extracted from both filters using a phenol-chloroform protocol (Wright et al., 2009).

Degenerate primers were designed based on a multiple sequence alignment of known PRs for maximum diversity coverage using the conserved  
105 regions in helices C and F (based on a set of primers previously reported by us, (Atamna-Ismaeel et al., 2008, 2010) and modified to include *KpnI* and *ngpMIV* sites). Each PCR reaction was performed using Takara Ex Taq<sup>TM</sup> polymerase (Takara-bio, Korea). Polymerase chain reaction amplification was

carried out in a total volume of 50  $\mu$ l containing 1  $\mu$ l DNA template, 0.2 mM  
110 dNTPs, 1X Ex Taq buffer (Mg<sup>2+</sup> plus), 0.6  $\mu$ M primers (each) and 1.25 U  
Takara Ex Taq™ DNA polymerase. The amplification conditions included  
steps at 98°C for 5 sec, 40 cycles of 98°C for 10 sec, 50°C for 1.5 min and  
72°C for 2 min.

### 115 *Cloning and expression*

PCR products were double-digested with *KpnI* and *NgoMIV* in  
NEBuffer™ 1.1 buffer (New England BioLabs) for 2 hours at 37°C, cleaned  
using ½ volume of phenol and ½ volume of chloroform then 1 volume of  
chloroform, and heated to 70°C for 10 min to remove residual chloroform by  
120 evaporation.

The cloning vector was extracted from cells using only QIAprep Spin  
Miniprep Kit (Quiagen) since other methods do not enable efficient restriction,  
digested with *KpnI* and *NgoMIV* in 1.1 buffer (New England BioLabs), and  
separated from the 114 bp insert on 1% agarose gel. Cut vector was  
125 extracted from gel using NucleoSpin® Gel and PCR Clean-up (Macherey-  
Nagel, Düren, Germany). Cloning vector and insert were ligated overnight  
using T4 DNA ligase (Thermo Scientific, Lithuania) at 4°C. The next day,  
ligation was inactivated using 70°C for 10 min and dialyzed for 1 hour on  
VSWP-25 filters (Millipore) against DDW. Ligations were transformed into  
130 electro-competent DH10B *E. coli* cells (4.5  $\mu$ l into 30  $\mu$ l cells), and shaken in  
0.5 ml SOC medium at 37°C and 200 rpm. 0.25 ml was plated on LB-agar

ampicillin (Amp) plates and incubated overnight. Colonies were transferred to 96-well plates with 230  $\mu$ l LB-10% glycerol Amp for long-term storage. For initial color expression, plates were duplicated to U-shaped bottom 96-well  
135 plates (Thermo Scientific, Denmark) with 150  $\mu$ l LB, 50  $\mu$ g/ml Amp, 1.2 mM IPTG and 15  $\mu$ M all-*trans* retinal, shaken at 37°C and 250 rpm, and covered overnight with AeraSeal™ air permeable sheet (EXCEL Scientific, California, USA). Plates were centrifuged at 3,000X RCF (Sigma 4-16KS centrifuge) at room temperature for the detection of cell color.

140

#### *Absorption assay of intact cells and purified protein*

A fresh colony was used to inoculate 50 ml LB 50  $\mu$ g/ml Amp, 1.2 mM IPTG and 15  $\mu$ M all-*trans* retinal, and shaken at 37°C and 200 rpm in a 125 ml Erlenmeyer. Cells were collected by centrifugation, washed twice with buffer A  
145 (50 mM Tris-HCl pH 8 and 5 mM MgCl<sub>2</sub>), then resuspended in 1 ml of the same solution. The absorbance of the supernatant was recorded between 400 and 800 nm using a spectrophotometer (Shimadzu UV-1800, Japan) against buffer A blank. In addition, absorbance spectra of purified protein was measured as described previously (Choi et al., 2013). The results are  
150 summarized in the supplementary material (Supplementary File S2) with the subtraction of the negative control signal and purified protein spectra.

#### *Sequencing and phylogenetic analysis*

All clones were extracted using the standard alkaline lysis miniprep  
155 protocol and sequenced using standard M13R primer  
(GCGGATAACAATTTTCACACAGG, Macrogen, Korea). The unique middle  
parts of each clone, excluding any primer sequences, were deposited in  
GenBank under accession numbers KY963379-KY963416, eliminating  
redundant sequences at each depth. Full detailed chimeric sequences of all  
160 clones are available in the supplementary material (Supplementary File S4).

A maximum likelihood phylogenetic tree was constructed using the  
phylogeny.fr pipeline (Dereeper et al., 2008), which included PhyML v3.0  
(Guindon et al., 2010), the WAG substitution model for amino acids (Whelan  
and Goldman, 2001) and 100 bootstrap replicates.

165

### *Proton pumping activity assay*

Cells were inoculated from a fully thawed plate into two 96-well 2.2 ml  
plates (ABgene, UK, Cat. No. AB-0932) filled with 1 ml LB (50 µg/ml  
ampicillin, 1.2 mM IPTG and 15 µM all-*trans* retinal) in each well and grown at  
170 30°C, shaken at 700 rpm for 17 hours. Cells were collected by centrifugation  
at 3,000X RCF (Sigma 4-16KS centrifuge) and washed twice with 0.5 ml  
minimal salt solution (10 mM NaCl, 10 mM MgSO<sub>4</sub> and 10 mM CaCl<sub>2</sub>). Finally,  
cells from both plates were re-suspended in a 150 µl (final volume) minimal  
salt solution in dark well plates with a transparent bottom (Greiner Bio-One,  
175 Cat. No. 655096). Cells were allowed to settle for 10 min in the dark at RT,  
after which a functional screening was performed using a customized robotic



system (TECAN, Männedorf, Switzerland) as follows: pH from eight pH electrodes (Sentek UK, Cat. No. P13/2.5M/BNC) was recorded simultaneously by a multi-parameter analyzer (Consort, Belgium, model 3060) with readings logged every 1 sec for 3 min of dark, followed by 2 min of illumination by 2 LED lights, warm white light (2,600-3,700 CCT spanning 420-700 nm, intensity 12 lm, Cree Inc.) and blue light (485 nm peak, flux 10.7 lm, Cree Inc.), constituting all visible spectra under each well. The dark/light cycles were measured twice to confirm consistency. Eight wells were measured simultaneously, each illuminated by two LED lights at a distance of 17 mm between the LEDs and the cells, a setup constructed by Neotec Scientific Instrumentation Ltd. (Kfar Saba, Israel). Each well received a light intensity of  $450 \mu\text{mol photons m}^{-2} \text{ s}^{-1}$ .

## 190 **Abbreviated Protocol**

Please add here RV1\_SUPPfileS3.docx

## **Results and discussion**

195 We used a GPR-containing vector with designed restriction sites (Choi et al., 2013) and replaced the middle part of the PR with a shorter random DNA sequence that is incompatible with the open reading frame (ORF) of the third part of the chimera (Supplementary Fig. S1), thereby introducing a premature

stop codon. This new vector (pKa00X) was created to avoid the high  
200 background (reddish colonies) observed with the original chimeric GPR vector  
(pKa001), which does not allow distinguishing newly found GPR from an  
uncut vector. The chimeric rhodopsin also contains a C-terminal 6-His tag,  
allowing the purification of positive proteins for further characterization.

We used extracted DNA samples collected from multiple depths (0 to  
205 100 meters at 20-meter intervals). All samples tested positive for PRs,  
resulting in two PCR amplicons of ~400 bp and ~330 bp (Supplementary Fig.  
S2). Two 96-well plates of clones were picked for each depth to detect  
colored colonies for further study (Fig. 2). Out of a total of 1,152 colonies, 45  
had visible color and were chosen for further characterization. The PRs  
210 obtained showed absorption spectra expected from the depth they were  
collected from, with yellow-absorbing PR (YPR; purple colonies) and GPR  
(red colonies) found in surface waters, while BPRs (orange colonies) were  
found mostly in the deeper samples (Fig. 3A). The visual results allowed us  
to selectively choose the different positive phenotypes for further analysis and  
215 sequencing. The PRs amplified by our primers were diverse, with some being  
similar to PRs from different microbial groups ranging from Marine Group II  
(MGII) Euryarchaeota through the proteobacterial groups SAR11, SAR86 and  
SAR92, to Flavobacteria (Fig. 3B).

Position 105 in PR is believed to be the main determining position for PR  
220 wavelength absorption (Man et al., 2003); non-polar methionine (Gómez-  
Consarnau et al., 2007) or leucine at position 105 results in GPR, while the  
polar glutamine residue at position 105 results in BPR. Several interesting

exceptional cases were observed in our screen: clone 1 and 10 are YPR  
although they contain leucine at position 105, while clones 36, 37 and 44  
225 appear as GPR although having a glutamine at position 105 (Fig. 3). In the  
case of clones 36 and 37, we can presume that the cause of the red shift  
could be attributed to another similar clone (clone 34, with only one amino  
acid change compared to clone 36; see Fig. 4) absorbed in the blue. The  
change is a cysteine to a tyrosine residue in the loop region between  
230 transmembranal domains E and F. This region was previously reported to  
influence spectral tuning (Yoshitsugu et al., 2008). Further work with clones 1,  
10 and 44 should be performed in order to understand their spectral tuning  
mechanism.

Furthermore, to test the adsorption spectra, we compared our whole-  
235 cell measurements with purified protein measurement (Choi et al., 2013). A  
detailed comparison of the two methods is presented in the supplementary  
material (Supplementary File S2). The advantages of whole-cell measurement  
are rapid results acquisition with minimal expenses and equipment, which are  
specifically relevant to basic laboratory courses. On the other hand, purified  
240 protein measurement has a much greater signal-to-noise ratio due to the  
absence of cell content interference, yet requires a longer protocol with higher  
costs. Both spectra obtaining methods are influenced by the pH of the  
medium so the exact pH should be noted at each measurement. An  
abbreviated and detailed protocol is attached to the supplementary material  
245 for use in teaching and research (Supplementary File S3).

## Concluding remarks

To determine if the clones are functional proton pumps, a light-driven proton pumping assay was performed as described in (Pushkarev and Béjà, 250 2016). Proton pumping activity was observed in all chimeric PRs with varying intensities (Supplementary File S2). This shows that although the clones generated by this assay are chimeric, they are functional (i.e. able to transport protons across the membrane), and could therefore be used for teaching and discussing various aspects connected to rhodopsins, such as the use of 255 uncouplers, change of membrane potential, proton pumping under various wavelengths, the conversion of light energy to potential or chemical energy, and more.

Expression of environmental PR fragments depends on primer matching, correct length of PCR product, frame and compatibility to the chimeric 260 construct. Therefore, it would be interesting to compare the chimeric ligation results to standard TA cloning of the PCR fragments. This would allow the estimation of the rhodopsins “left in the dark” in such an experiment, and a comparison of the sequences to the ones that underwent expression in the chimeric vector. This could also be useful for altering the primers to better 265 express rhodopsins from a specific environment. Even though conserved regions between helix C and F are important for color tuning (Man et al., 2003; Choi et al., 2013), it would also be interesting to create chimeric constructs where the constant part is of BPR or YPR origin for the expression of protein and testing the dominance of each part over the spectral tuning 270 residues.

In terms of environmental implications, the fact that we retrieved two YPRs implies that besides the known GPRs and BPRs (and now YPR), more is yet to be found. Red light penetrates as deep as 25 meters in clear oceanic water, therefore the existence of more natural YPR, as well as orange- and red-absorbing PR variants, are expected in future experiments with the new chimeric PR vector. Although we have tested using ocean genomic samples, this will also apply to freshwater, lakes, glaciers, etc.

## Acknowledgments

The authors would like to thank the captain and crew of the R/V Sam Rothberg of the Inter University Institute in Eilat, Israel, for their expert assistance at sea and for providing their facilities for primary processing of the samples.

This work was supported by Israel Science Foundation grant 1769/12, the I-CORE Program of the Planning and Budgeting Committee, the Grand Technion Energy Program (GTEP), The Leona M. and Harry B. Helmsley Charitable Trust reports on Alternative Energy series of the Technion – Israel Institute of Technology and Weizmann Institute of Science, and NRF grants of Korea-2016R1A6A3A11934084 and 2015R1D1A1A01058917.

290

## Conflict of Interest

The authors declare no conflict of interest.

**Table 1.** Degenerate primers designed to amplify diverse PRs using PCR reactions.

| Primer name           | Nucleotide sequence                                 |
|-----------------------|-----------------------------------------------------|
| <i>KpnI</i> -LRYLDWIL | 5'-AAGAATTCM <b>GGTACC</b> TNGAYTGG-3' <sup>a</sup> |
| GWAIYP- <i>ngoMIV</i> | 5'-GCGCGCAAGCTT <b>GCCGGC</b> NGGRTADATNVHCCANCC-3' |

295

<sup>a</sup>Restriction site sequences are shown in bold letters

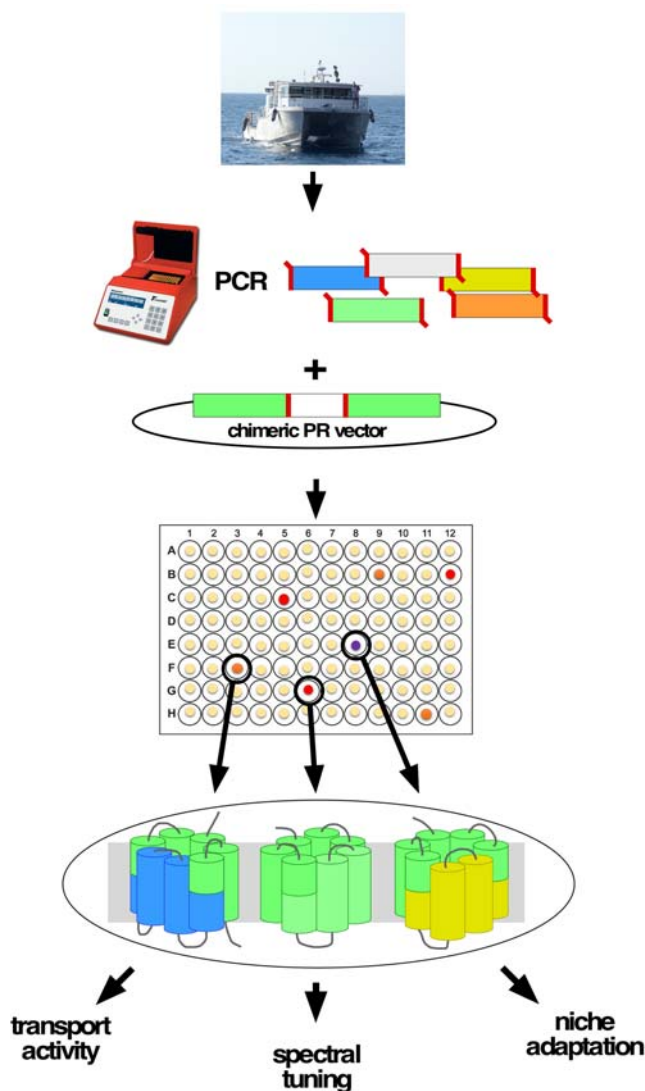

300 **Figure 1.** A schematic representation of the suggested protocol for the use of  
chimeric rhodopsin. DNA samples are obtained by various methods from the  
desired niches, then a PCR reaction is carried out using degenerate primers  
listed in Table 1. The PCR product is then digested and cloned directly onto  
the expression vector. The resulting colonies are harvested into individual  
305 cells in a 96-well format for storage, expression and further study.

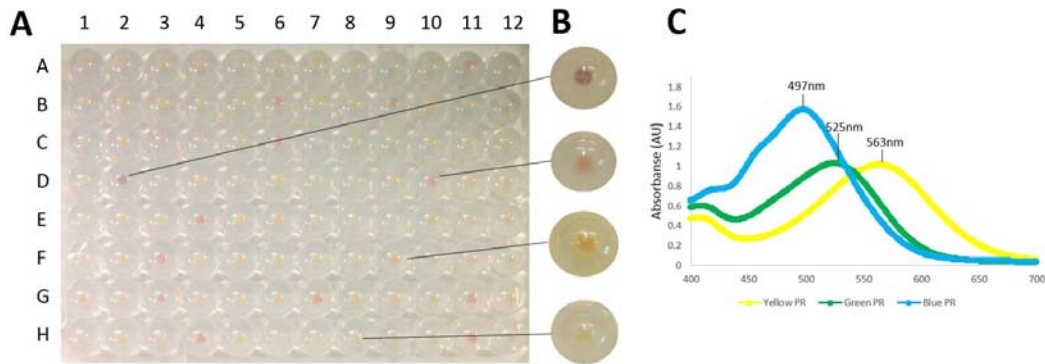

**Figure 2.** A photograph demonstrating results from one of the expression plates in this study. (A) Colonies were grown in 96-well plates as described in Materials and Methods, induced by IPTG in the presence of all-*trans* retinal. (B) A close-up of representative clones (from top to bottom): yellow-, green- and blue-absorbing chimeric rhodopsin, and empty vector pKa00x. (C) Absorption spectra of purified protein representing yellow-, green- and blue-absorbing chimeric rhodopsins (BPR; #42, YPR; #1, GPR; #11).





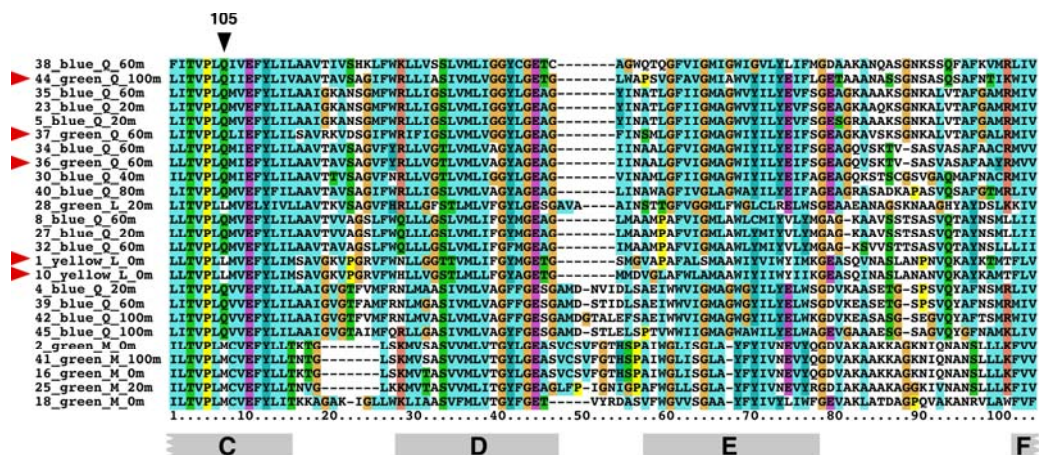

**Figure 4.** Protein sequence alignment of representative clones found in this study. Position 105 is marked (black arrow). Red arrows mark the clones 330 showing a discrepancy between phenotype and genotype according to position 105. At the bottom of the alignment are the corresponding transmembrane helices of PR.

## Supplementary Material

335 **Supplementary Figure S1.** Chimeric construct for the expression of partial  
rhodopsin genes from the environment. (A) pKa001 is the original construct  
used for the expression of verified PR sequences in previous studies (GPR  
phenotype) compared to pKa00x harboring a short ORF disrupting random  
sequence (no phenotype) for background elimination during screening. (B) A  
340 schematic representation of the seven transmembranes of PR. The middle  
part is replaced by partial rhodopsins from the environment. The dominant  
spectral tuning residue is in the interchangeable region between helices C  
and F.

345 **Supplementary Figure S2.** PCR resulted in PR amplification at all depths  
tested on March 3, 2014 at station A, the Red Sea. Primers used in this  
reaction are listed in Table 1. The reaction resulted in two bands of  
approximately 400 and 330 bp. The marker used in this 1% agarose gel is  
100bp DNA Ladder RTU (GeneDirex®).

350

## References

- Atamna-Ismaeel, N., Sabehi, G., Sharon, I., Witzel, K.-P., Labrenz, M., Jürgens, K. et al. (2008) Widespread distribution of proteorhodopsins in freshwater and brackish ecosystems. *ISME J* **2**: 656-662.
- 355 Atamna-Ismaeel, N., Sabehi, G., Sharon, I., Witzel, K.-P., Labrenz, M., Jürgens, K. et al. (2010) CORRIGENDUM: Widespread distribution of proteorhodopsins in freshwater and brackish ecosystems. *ISME J* **4**: 462.
- Béjà, O., Pinhassi, J., and Spudich, J.L. (2013) Proteorhodopsins: Widespread Microbial Light-Driven Proton Pumps. In *Encyclopedia of Biodiversity*. Levin, S.A. (ed). New York: Elsevier, pp. 280-285.
- 360 Béjà, O., Spudich, E.N., Spudich, J.L., Leclerc, M., and DeLong, E.F. (2001) Proteorhodopsin phototrophy in the ocean. *Nature* **411**: 786-789.
- Béjà, O., Aravind, L., Koonin, E.V., Suzuki, M.T., Hadd, A., Nguyen, L.P. et al. (2000) Bacterial rhodopsin: evidence for a new type of phototrophy in the sea. *Science* **289**: 1902-1906.
- 365 Choi, A.R., Kim, S.J., Jung, B.H., and Jung, K.H. (2013) Characterization of the chimeric seven-transmembrane protein containing conserved region of helix C-F of microbial rhodopsin from Ganges River. *Appl Microbiol Biotechnol* **97**: 819-828.
- 370 Dereeper, A., Guignon, V., Blanc, G., Audic, S., Buffet, S., Chevenet, F. et al. (2008) Phylogeny.fr: robust phylogenetic analysis for the non-specialist. *Nucleic Acids Res* **36**: W465-469.
- Finkel, O.M., Béjà, O., and Belkin, S. (2012) Global abundance of microbial rhodopsins. *ISME J* **7**: 448-451.
- 375 Gómez-Consarnau, L., González, J.M., Coll-Lladó, M., Gourdon, P., Pascher, T., Neutze, R. et al. (2007) Light stimulates growth of proteorhodopsin-containing marine Flavobacteria. *Nature* **445**: 210-213.
- Guindon, S., Dufayard, J.F., Lefort, V., Anisimova, M., Hordijk, W., and Gascuel, O. (2010) New algorithms and methods to estimate Maximum-Likelihood phylogenies: assessing the performance of PhyML 3.0. *Syst Biol* **59**: 307-321.
- 380 Koh, E.Y., Atamna-Ismaeel, N., Martin, A., Cowie, R.O., Beja, O., Davy, S.K. et al. (2010) Proteorhodopsin-bearing bacteria in Antarctic sea ice. *Appl Environ Microbiol* **76**: 5918-5925.
- 385 Man, D., Wang, W., Sabehi, G., Aravind, L., Post, A.F., Massana, R. et al. (2003) Diversification and spectral tuning in marine proteorhodopsins. *EMBO J* **22**: 1725-1731.
- Martínez, A., Bradley, A.S., Waldbauer, J., Summons, R.E., and DeLong, E.F. (2007) Proteorhodopsin photosystem gene expression enables photophosphorylation in heterologous host. *Proc Natl Acad Sci U S A* **104**: 5590-5595.
- 390 Oesterhelt, D., and Stoekenius, W. (1971) Rhodopsin-like protein from the purple membrane of *Halobacterium halobium*. *Nat New Biol* **233**: 149-152.
- Philosof, A., and Béjà, O. (2013) Bacterial, archaeal and viral-like rhodopsins from the Red Sea. *Environ Microbiol Rep* **5**: 475-482.
- 395 Pinhassi, J., DeLong, E.F., Béjà, O., Gonzalez, J.M., and Pedros-Alio, C. (2016) Marine bacterial and archaeal ion-pumping rhodopsins: genetic diversity, physiology and ecology. *Microbiol Mol Biol Rev* **80**: 929-954.

- 400 Pushkarev, A., and Béjà, O. (2016) Functional metagenomic screen reveals new  
and diverse microbial rhodopsins. *ISME J* **10**: 2331-2335.
- Rusch, D.B., Halpern, A.L., Heidelberg, K.B., Sutton, G., Williamson, S.J., Yooseph, S.  
et al. (2007) The Sorcerer II Global Ocean Sampling expedition: I, The  
northwest Atlantic through the eastern tropical Pacific. *PLoS Biol* **5**: e77.
- 405 Sabehi, G., Loy, A., Jung, K.H., Partha, R., Spudich, J.L., Isaacson, T. et al. (2005)  
New insights into metabolic properties of marine bacteria encoding  
proteorhodopsins. *PLoS Biol* **3**: e173.
- Sharma, A.K., Sommerfeld, K., Bullerjahn, G.S., Matteson, A.R., Wilhelm, S.W.,  
Jezbera, J. et al. (2009) Actinorhodopsin genes discovered in diverse  
freshwater habitats and among cultivated freshwater *Actinobacteria*. *ISME J*  
410 **3**: 726-737.
- Venter, J.C., Remington, K., Heidelberg, J., Halpern, A.L., Rusch, D., Eisen, J.A. et al.  
(2004) Environmental genome shotgun sequencing of the Sargasso Sea.  
*Science* **304**: 66-74.
- Whelan, S., and Goldman, N. (2001) A general empirical model of protein  
415 evolution derived from multiple protein families using a maximum-  
likelihood approach. *Mol Biol Evol* **18**: 691-699.
- Wright, J.J., Lee, S., Zaikova, E., Walsh, D.A., and Hallam, S.J. (2009) DNA extraction  
from 0.22  $\mu$ M sterivex filters and cesium chloride density gradient  
centrifugation. *J Vis Exp* **31**: 1352.
- 420 Yoshitsugu, M., Shibata, M., Ikeda, D., Furutani, Y., and Kandori, H. (2008) Color  
change of proteorhodopsin by a single amino acid replacement at a distant  
cytoplasmic loop. *Angew Chem Int Ed Engl* **47**: 3923-3926.
- Yutin, N., and Koonin, E.V. (2012) Proteorhodopsin genes in giant viruses. *Biol*  
*Direct* **7**: 34.
- 425
